# Supplementary material for: Polymeric nanocapsules with up-converting nanocrystals cargo make ideal fluorescent bioprobes
Source: PubMed Central journal article supplement (PMC4942829; doi:10.1038/srep29746), 2016-07-13
Supplement: srep29746-s1.pdf [file srep29746-s1.pdf]

## Supplementary information (ESI) for

# Polymeric nanocapsules with up-converting nanocrystals cargo make ideal fluorescent bioprobes

U. Bazylińska<sup>a</sup>, D. Wawrzyńczyk<sup>b</sup>, J. Kulbacka<sup>c</sup>, R. Frąckowiak<sup>a</sup>, B. Cichy<sup>d</sup>,  
A. Bednarkiewicz<sup>d,e</sup>, M. Samoć<sup>b\*</sup>, K. A. Wilk<sup>a\*</sup>

<sup>a)</sup> Department of Organic and Pharmaceutical Technology, Faculty of Chemistry, Wrocław University of Science and Technology, Wybrzeże Wyspiańskiego 27, 50-370 Wrocław, Poland.

E: mail: kazimiera.wilk@pwr.edu.pl

<sup>b)</sup> Advanced Materials Engineering and Modelling Group, Faculty of Chemistry, Wrocław University of Science and Technology, Wybrzeże Wyspiańskiego 27, 50-370 Wrocław, Poland,

E: mail: marek.samoc@pwr.edu.pl

<sup>c)</sup> Department of Medical Biochemistry, Medical University of Wrocław, Chałubińskiego 10, 50-368 Wrocław, Poland

<sup>d)</sup> Institute of Low Temperature and Structure Research, PAS, Okólna 2, 50-422 Wrocław, Poland

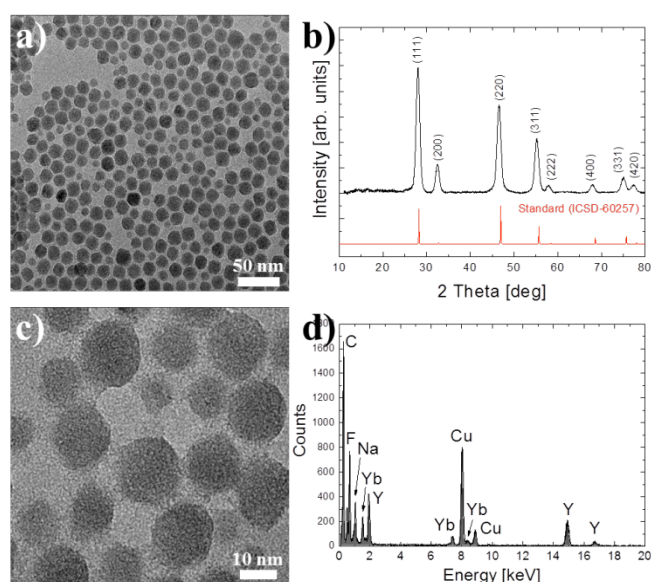

**Fig. S1** Characterization of as synthesized  $\text{NaYF}_4:\text{Tm}^{3+}, \text{Yb}^{3+}$  NPs. TEM (a) and HRTEM (c) images of  $\text{NaYF}_4:\text{Tm}^{3+}, \text{Yb}^{3+}$  NPs dried from chloroform solutions, together with measured XRD and standard ICSD-60257 patterns (b) and EDS spectrum (d).

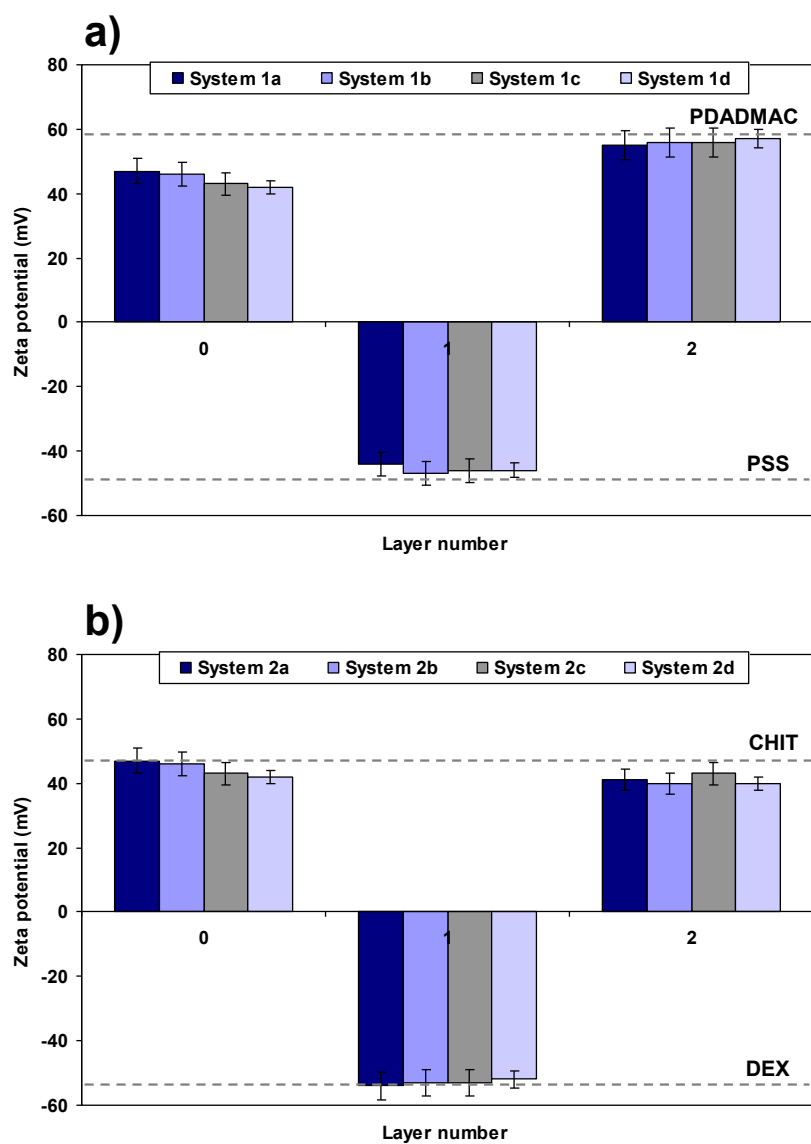

**Fig. S2** Layer-to-layer variations of the zeta potential for PSS/PDADMAC (a) and DEX/CHIT coated polymeric template (n=0), empty and loaded by NaYF<sub>4</sub>:Tm<sup>3+</sup>,Yb<sup>3+</sup> NPs (see descriptions for the systems in Table 1).

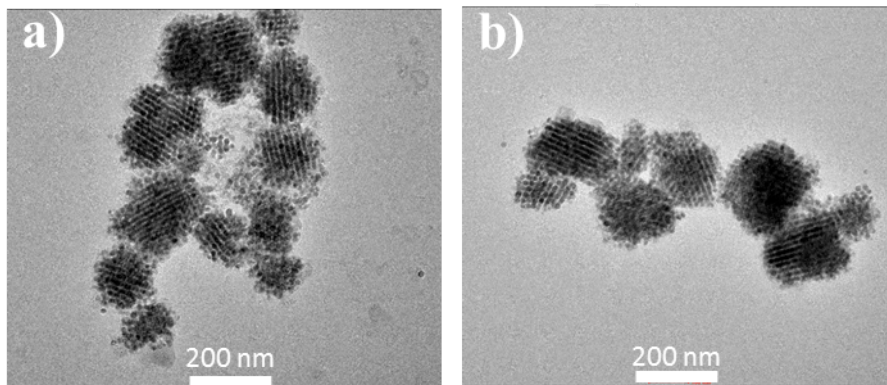

Fig.S3. Representative TEM images of polymeric nanocapsules with  $\text{NaYF}_4:\text{Tm}^{3+}, \text{Yb}^{3+}$  NPs showing the dispersion of their morphology and sizes.

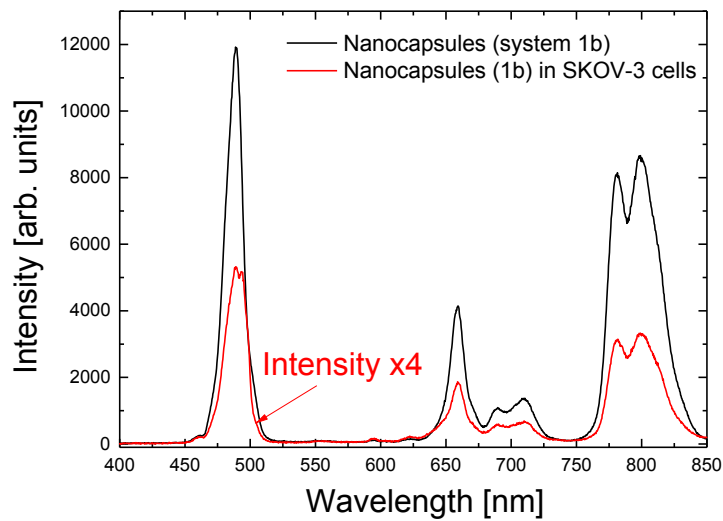

Fig. S4. Representative up-conversion emission spectra of dried solution of nanocapsules (system 1b according to the Table 1) loaded with  $\text{NaYF}_4:\text{Tm}^{3+}, \text{Yb}^{3+}$  NPs and after incubation with cancer ovarian SKOV-3 cells.
